# Supplementary material for: Virulence Determinants and Methicillin Resistance in Biofilm-Forming Staphylococcus aureus from Various Food Sources in Bangladesh
Source: MDPI journal article supplement (doi:10.3390/antibiotics11111666), 2022-11-20
Supplement: s1 [file s1]

## Supplementary Data

### Virulence Determinants and Methicillin Resistance in Biofilm-Forming *Staphylococcus aureus* from Various Food Sources in Bangladesh

Fatimah Muhammad Ballah<sup>1,2</sup>, Md. Saiful Islam<sup>1</sup>, Md. Liton Rana<sup>1</sup>, Md. Ashek Ullah<sup>1</sup>, Farhana Binte Ferdous<sup>1</sup>, Fahim Haque Nelay<sup>1</sup>, Samina Ievy<sup>1</sup>, Md. Abdus Sobur<sup>1</sup>, AMM Taufiquer Rahman<sup>3</sup>, Mst. Minara Khatun<sup>1</sup>, Marzia Rahman<sup>1</sup>, Md. Tanvir Rahman<sup>1\*</sup>

<sup>1</sup>Department of Microbiology and Hygiene, Faculty of Veterinary Science, Bangladesh Agricultural University, Mymensingh-2202, Bangladesh

<sup>2</sup>Department of Veterinary Public Health and Preventive Medicine, Usmanu Danfodiyo University, Sokoto 840004, Nigeria

<sup>3</sup>Naogaon District Hospital, Naogaon- 6500, Bangladesh

\*Corresponding author: tanvirahman@bau.edu.bd

**Supplementary Table S1.** Distribution of genes associated with biofilm formation, antibiotic resistance patterns, and virulence profiles in *S. aureus* isolates

| SL No. | Source | Name of isolates | Degree of biofilm-formation | Biofilm-associated genes      | Antibiotic resistance patterns |                   | Virulence-associated genes |
|--------|--------|------------------|-----------------------------|-------------------------------|--------------------------------|-------------------|----------------------------|
|        |        |                  |                             |                               | Phenotypic                     | Genotypic         |                            |
| 1      |        | HHS3             | Strong                      | <i>icaA, icaB, icaC, icaD</i> | OX, AMP, P, CX                 | <i>mecA, blaZ</i> | <i>sea, tst</i>            |

|    |                        |       |              |                              |                             |                         |                      |
|----|------------------------|-------|--------------|------------------------------|-----------------------------|-------------------------|----------------------|
| 2  | Human<br>hand<br>swabs | HHS8  | Intermediate | -                            | OX, AMP, P, CX              | <i>mecA, blaZ</i>       | -                    |
| 3  |                        | HHS10 | Intermediate | -                            | OX, AMP, P, CX              | <i>mecA, blaZ</i>       | -                    |
| 4  |                        | HHS19 | Intermediate | <i>icaB, icaD, bap</i>       | OX, AMP, P, CX              | <i>blaZ</i>             | -                    |
| 5  |                        | HHS6  | Intermediate | -                            | E, OX, AMP, P, CX           | <i>blaZ</i>             | -                    |
| 6  |                        | HHS2  | Strong       | <i>icaB, icaD, bap</i>       | AZM, OX, AMP, P, CX         | <i>blaZ</i>             | <i>sea, tst, PVL</i> |
| 7  |                        | HHS1  | Intermediate | -                            | AZM, OX, AMP, P, CX         | <i>blaZ</i>             | -                    |
| 8  |                        | HHS26 | Intermediate | -                            | OX, AMP, P, CX              | <i>mecA, blaZ</i>       | -                    |
| 9  |                        | HHS9  | Intermediate | -                            | OX, AMP, P, CX              | <i>blaZ</i>             | <i>PVL</i>           |
| 10 |                        | HHS41 | Intermediate | -                            | E, OX, AMP, P, CX           | <i>mecA, blaZ</i>       | -                    |
| 11 |                        | HHS5  | Intermediate | -                            | COT, OX, AMP, P, CX         | <i>mecA, blaZ</i>       | -                    |
| 12 |                        | HHS4  | Intermediate | -                            | COT, OX, AMP, P, CX         | <i>mecA, blaZ</i>       | -                    |
| 13 |                        | HHS11 | Non-former   | -                            | OX, AMP, P, CX              | <i>blaZ</i>             | -                    |
| 14 |                        | HHS32 | Intermediate | -                            | OX, AMP, P, CX              | <i>blaZ</i>             | -                    |
| 15 | Egg<br>surfaces        | ES4   | Intermediate | <i>icaB, icaD</i>            | OX, AMP, P, CX              | <i>mecA, blaZ</i>       | <i>sea</i>           |
| 16 |                        | ES1   | Intermediate | -                            | OX, AMP, P, CX              | <i>blaZ</i>             | -                    |
| 17 |                        | ES15  | Intermediate | -                            | OX, AMP, P, CX, TE          | <i>mecA, tetA, blaZ</i> | -                    |
| 18 |                        | ES22  | Intermediate | -                            | OX, AMP, P, CX              | <i>mecA, blaZ</i>       | -                    |
| 19 |                        | ES3   | Intermediate | -                            | OX, AMP, P, CX              | <i>mecA, blaZ</i>       | <i>PVL</i>           |
| 20 |                        | ES12  | Intermediate | <i>icaA, icaB, icaD, bap</i> | OX, AMP, P, CX              | <i>blaZ</i>             | -                    |
| 21 |                        | ES51  | Intermediate | -                            | OX, AMP, P, CX              | <i>mecA, blaZ</i>       | -                    |
| 22 |                        | ES39  | Intermediate | -                            | AZM, GEN, OX, AMP, P,<br>CX | <i>mecA, blaZ</i>       | <i>sea</i>           |

|    |          |      |              |                              |                        |                         |                 |
|----|----------|------|--------------|------------------------------|------------------------|-------------------------|-----------------|
| 23 |          | ES25 | Intermediate | -                            | OX, AMP, P, CX         | <i>mecA, blaZ</i>       | -               |
| 24 |          | ES16 | Intermediate | -                            | OX, AMP, P, CX         | <i>mecA, blaZ</i>       | -               |
| 25 |          | ES13 | Intermediate | -                            | OX, AMP, P, CX, TE     | <i>mecA, tetC, blaZ</i> | -               |
| 26 |          | ES60 | Intermediate | -                            | OX, AMP, P, CX         | <i>blaZ</i>             | -               |
| 27 |          | ES48 | Intermediate | -                            | E, OX, AMP, P, CX      | <i>mecA, blaZ</i>       | -               |
| 28 |          | ES8  | Intermediate | <i>icaA, icaB, icaD, bap</i> | OX, AMP, P, CX         | <i>mecA, blaZ</i>       | -               |
| 29 |          | ES55 | Intermediate | -                            | CIP, OX, AMP, P, CX    | <i>mecA, blaZ</i>       | -               |
| 30 | Raw milk | RM6  | Intermediate | -                            | OX, AMP, P, CX         | <i>mecA, blaZ</i>       | -               |
| 31 |          | RM4  | Intermediate | <i>icaA, bap</i>             | OX, AMP, P, CX         | <i>blaZ</i>             | -               |
| 32 |          | RM8  | Intermediate | <i>icaA, icaB, icaD</i>      | E, OX, AMP, P, CX      | <i>blaZ</i>             | <i>tst, PVL</i> |
| 33 |          | RM1  | Intermediate | -                            | GEN, OX, AMP, P, CX    | <i>mecA, blaZ</i>       | -               |
| 34 |          | RM37 | Intermediate | -                            | OX, AMP, P, CX         | <i>mecA, blaZ</i>       | -               |
| 35 |          | RM35 | Intermediate | -                            | C, OX, AMP, P, CX      | <i>mecA, blaZ</i>       | -               |
| 36 |          | RM24 | Intermediate | -                            | E, OX, AMP, P, CX      | <i>mecA, blaZ</i>       | -               |
| 37 |          | RM40 | Intermediate | -                            | E, OX, AMP, P, CX      | <i>blaZ</i>             | -               |
| 38 |          | RM9  | Intermediate | <i>icaA, icaB, icaD</i>      | E, OX, AMP, P, CX      | <i>blaZ</i>             | <i>sea</i>      |
| 39 |          | RM50 | Intermediate | -                            | E, OX, AMP, P, CX      | <i>mecA, blaZ</i>       | -               |
| 40 |          | RM42 | Intermediate | -                            | E, OX, AMP, P, CX      | <i>mecA, blaZ</i>       | -               |
| 41 |          | RM51 | Intermediate | -                            | E, GEN, OX, AMP, P, CX | <i>mecA, blaZ</i>       | -               |
| 42 |          | RM28 | Intermediate | -                            | E, OX, AMP, P, CX      | <i>blaZ</i>             | -               |
| 43 |          | RM15 | Intermediate | -                            | OX, AMP, P, CX         | <i>blaZ</i>             | -               |
| 44 |          | RM19 | Intermediate | -                            | OX, AMP, P, CX         | <i>mecA, blaZ</i>       | -               |

|    |                    |           |              |                                    |                        |                         |                      |
|----|--------------------|-----------|--------------|------------------------------------|------------------------|-------------------------|----------------------|
| 45 | Ready-to-eat foods | REF2(s)   | Strong       | -                                  | E, OX, AMP, P, CX      | <i>mecA, blaZ</i>       | <i>sea</i>           |
| 46 |                    | REF20(f)  | Strong       | -                                  | OX, AMP, P, CX, TE     | <i>mecA, blaZ</i>       | <i>sea, tst, PVL</i> |
| 47 |                    | REF3(p)   | Intermediate | -                                  | GEN, OX, AMP, P, CX    | <i>blaZ</i>             | <i>sea, tst</i>      |
| 48 |                    | REF2(v)   | Intermediate | -                                  | OX, AMP, P, CX         | <i>mecA, blaZ</i>       | -                    |
| 49 |                    | REF1(v)   | Strong       | <i>icaA, icaB, icaD, bap</i>       | E, OX, AMP, P, CX      | <i>mecA, blaZ</i>       | <i>sea, tst, PVL</i> |
| 50 |                    | REF6(s)   | Strong       | -                                  | E, GEN, OX, AMP, P, CX | <i>mecA, blaZ</i>       | <i>sea, tst, PVL</i> |
| 51 |                    | REF2(f)   | Intermediate | -                                  | OX, AMP, P, CX         | <i>mecA, blaZ</i>       | -                    |
| 52 |                    | REF6(p)   | Strong       | -                                  | E, OX, AMP, P, CX      | <i>mecA, blaZ</i>       | <i>sea, tst</i>      |
| 53 |                    | REF1(p)   | Strong       | <i>icaA, icaB, icaD</i>            | E, COT, OX, AMP, P, CX | <i>mecA, blaZ</i>       | <i>sea, tst</i>      |
| 54 |                    | REF3(s)   | Intermediate | -                                  | OX, AMP, P, CX         | <i>mecA, blaZ</i>       | -                    |
| 55 |                    | REF4(p)   | Intermediate | -                                  | OX, AMP, P, CX         | <i>mecA, blaZ</i>       | -                    |
| 56 |                    | REF5(p)   | Strong       | <i>icaA, icaB, icaC, icaD, bap</i> | E, OX, AMP, P, CX, TE  | <i>mecA, tetC, blaZ</i> | <i>sea, tst, PVL</i> |
| 57 |                    | REF11(ff) | Intermediate | -                                  | E, OX, AMP, P, CX      | <i>blaZ</i>             | -                    |
| 58 |                    | REF4(ff)  | Strong       | -                                  | GEN, OX, AMP, P, CX    | <i>blaZ</i>             | <i>sea</i>           |
| 59 |                    | REF19(ff) | Strong       | -                                  | E, OX, AMP, P, CX      | <i>mecA, blaZ</i>       | <i>sea, tst, PVL</i> |
| 60 |                    | REF8(ff)  | Strong       | -                                  | E, OX, AMP, P, CX      | <i>mecA, blaZ</i>       | <i>sea</i>           |
| 61 |                    | REF17(ff) | Intermediate | -                                  | COT, OX, AMP, P, CX    | <i>blaZ</i>             | <i>sea, tst</i>      |
| 62 |                    | REF14(ff) | Strong       | -                                  | E, OX, AMP, P, CX      | <i>blaZ</i>             | <i>sea, tst, PVL</i> |
| 63 |                    | REF16(ff) | Strong       | -                                  | AZM, OX, AMP, P, CX    | <i>mecA, blaZ</i>       | <i>sea, tst</i>      |
| 64 |                    | REF12(ff) | Intermediate | -                                  | E, OX, AMP, P, CX, TE  | <i>tetA, blaZ</i>       | -                    |
| 65 |                    | REF18(ff) | Strong       | -                                  | E, OX, AMP, P, CX, TE  | <i>tetC, blaZ</i>       | <i>sea, PVL</i>      |

|    |      |          |              |                                    |                     |                   |                      |
|----|------|----------|--------------|------------------------------------|---------------------|-------------------|----------------------|
| 66 |      | REF14(f) | Strong       | <i>icaA, icaB, icaC, icaD, bap</i> | GEN, OX, AMP, P, CX | <i>mecA, blaZ</i> | <i>sea, tst, PVL</i> |
| 67 |      | REF1(ff) | Intermediate | -                                  | OX, AMP, P, CX      | <i>mecA, blaZ</i> | -                    |
| 68 |      | REF1(f)  | Strong       | -                                  | OX, AMP, P, CX      | <i>mecA, blaZ</i> | <i>sea, tst</i>      |
| 69 |      | REF20(f) | Strong       | -                                  | OX, AMP, P, CX      | <i>mecA, blaZ</i> | <i>sea, PVL</i>      |
| 70 |      | REF4(f)  | Non-former   | -                                  | OX, AMP, P, CX      | <i>blaZ</i>       | -                    |
| 71 | Fish | F22      | Intermediate | <i>icaA, icaB, icaC, icaD, bap</i> | E, OX, AMP, P, CX   | <i>blaZ</i>       | -                    |
| 72 |      | F1       | Intermediate | -                                  | OX, AMP, P, CX, TE  | <i>tetA, blaZ</i> | <i>tst</i>           |
| 73 |      | F19      | Intermediate | -                                  | E, OX, AMP, P, CX   | <i>blaZ</i>       | -                    |
| 74 |      | F4       | Intermediate | -                                  | E, OX, AMP, P, CX   | <i>mecA, blaZ</i> | -                    |
| 75 |      | F11      | Intermediate | <i>icaA, icaB, icaD</i>            | OX, AMP, P, CX      | <i>blaZ</i>       | <i>sea</i>           |
| 76 |      | F18      | Intermediate | <i>icaB, icaD</i>                  | OX, AMP, P, CX      | <i>blaZ</i>       | <i>sea, tst</i>      |
| 77 |      | F6       | Intermediate | -                                  | OX, AMP, P, CX      | <i>blaZ</i>       | -                    |
| 78 |      | F5       | Intermediate | -                                  | OX, AMP, P, CX      | <i>blaZ</i>       | -                    |
| 79 |      | F10      | Intermediate | <i>icaB, icaD</i>                  | OX, AMP, P, CX      | <i>mecA, blaZ</i> | <i>sea</i>           |
| 80 |      | F2       | Intermediate | -                                  | OX, AMP, P, CX      | <i>blaZ</i>       | -                    |
| 81 |      | F13      | Intermediate | -                                  | OX, AMP, P, CX      | <i>blaZ</i>       | -                    |
| 82 |      | F16      | Intermediate | -                                  | OX, AMP, P, CX      | <i>mecA, blaZ</i> | -                    |
| 83 |      | F9       | Intermediate | -                                  | GEN, OX, AMP, P, CX | <i>mecA, blaZ</i> | -                    |
| 84 |      | F3       | Non-former   | -                                  | OX, AMP, P, CX      | <i>blaZ</i>       | -                    |
| 85 |      | F20      | Intermediate | -                                  | E, OX, AMP, P, CX   | <i>mecA, blaZ</i> | -                    |

|     |                        |         |              |                                    |                     |                   |                 |
|-----|------------------------|---------|--------------|------------------------------------|---------------------|-------------------|-----------------|
| 86  | Chicken<br>raw<br>meat | CM1(b)  | Intermediate | -                                  | E, OX, AMP, P, CX   | <i>blaZ</i>       | <i>sea, PVL</i> |
| 87  |                        | CM2(t)  | Intermediate | -                                  | E, OX, AMP, P, CX   | <i>blaZ</i>       | -               |
| 88  |                        | CM1(t)  | Strong       | <i>icaA, icaB, icaC, icaD, bap</i> | OX, AMP, P, CX      | <i>mecA, blaZ</i> | <i>sea, PVL</i> |
| 89  |                        | CM3(b)  | Intermediate | <i>icaA, icaB, icaC, icaD</i>      | OX, AMP, P, CX      | <i>mecA, blaZ</i> | <i>tst</i>      |
| 90  |                        | CM4(t)  | Intermediate | <i>icaA, icaB, icaC, icaD</i>      | OX, AMP, P, CX      | <i>blaZ</i>       | <i>sea</i>      |
| 91  |                        | CM4(b)  | Intermediate | -                                  | OX, AMP, P, CX      | <i>mecA, blaZ</i> | -               |
| 92  |                        | CM3(t)  | Intermediate | -                                  | GEN, OX, AMP, P, CX | <i>mecA, blaZ</i> | -               |
| 93  |                        | CM5(t)  | Intermediate | -                                  | OX, AMP, P, CX      | <i>blaZ</i>       | -               |
| 94  |                        | CM5(b)  | Strong       | <i>icaB, icaD</i>                  | OX, AMP, P, CX      | <i>mecA, blaZ</i> | <i>sea, tst</i> |
| 95  |                        | CM6(b)  | Intermediate | -                                  | E, OX, AMP, P, CX   | <i>blaZ</i>       | -               |
| 96  |                        | CM11(b) | Intermediate | -                                  | GEN, OX, AMP, P, CX | <i>mecA, blaZ</i> | -               |
| 97  |                        | CM7(t)  | Intermediate | -                                  | GEN, OX, AMP, P, CX | <i>mecA, blaZ</i> | -               |
| 98  |                        | CM7(b)  | Intermediate | -                                  | OX, AMP, P, CX      | <i>mecA, blaZ</i> | -               |
| 99  |                        | CM8(b)  | Intermediate | -                                  | OX, AMP, P, CX      | <i>mecA, blaZ</i> | -               |
| 100 |                        | CM8(t)  | Intermediate | -                                  | OX, AMP, P, CX      | <i>mecA, blaZ</i> | -               |

Here, HHS= Human Hand Swab, ES= Egg Surface, RM= Raw Milk, REF= Ready-to-eat Food, v= Vegetable Fries, p= Puri, f= Fuchka, ff= French Fries, F= Fish, CM= Chicken Muscle, t= Thigh, b= Breast, C= Chloramphenicol, E= Erythromycin, COT= Co-trimoxazole, CIP= Ciprofloxacin, AZM= Azithromycin, GEN= Gentamicin, OX= Oxacillin, AMP= Ampicillin, TE= Tetracycline, P= Penicillin, CX= Cefoxitin.

**Supplementary Table S2.** Pearson correlation coefficients between any of two antibiotics showing resistance different foods and hand swab samples to *S. aureus* isolates detected from

|            |                     | C      | E      | COT    | CIP    | AZM    | GEN    | TE |
|------------|---------------------|--------|--------|--------|--------|--------|--------|----|
| <b>C</b>   | Pearson Correlation | 1      |        |        |        |        |        |    |
|            | Sig. (2-tailed)     | -      |        |        |        |        |        |    |
| <b>E</b>   | Pearson Correlation | -0.066 | 1      |        |        |        |        |    |
|            | Sig. (2-tailed)     | 0.515  | -      |        |        |        |        |    |
| <b>COT</b> | Pearson Correlation | -0.021 | -0.022 | 1      |        |        |        |    |
|            | Sig. (2-tailed)     | 0.839  | 0.826  | -      |        |        |        |    |
| <b>CIP</b> | Pearson Correlation | -0.01  | -0.066 | -0.021 | 1      |        |        |    |
|            | Sig. (2-tailed)     | 0.921  | 0.515  | 0.839  | -      |        |        |    |
| <b>AZM</b> | Pearson Correlation | -0.021 | -0.134 | -0.042 | -0.021 | 1      |        |    |
|            | Sig. (2-tailed)     | 0.839  | 0.185  | 0.681  | 0.839  | -      |        |    |
| <b>GEN</b> | Pearson Correlation | -0.035 | -0.091 | -0.072 | -0.035 | 0.091  | 1      |    |
|            | Sig. (2-tailed)     | 0.727  | 0.37   | 0.478  | 0.727  | 0.366  | -      |    |
| <b>TE</b>  | Pearson Correlation | -0.028 | 0.077  | -0.056 | -0.028 | -0.056 | -0.096 | 1  |
|            | Sig. (2-tailed)     | 0.785  | 0.447  | 0.58   | 0.785  | 0.58   | 0.34   | -  |

Here, a  $p$ -value less than 0.05 was considered statistically significant, C= Chloramphenicol, E= Erythromycin, COT= Co-trimoxazole, CIP= Ciprofloxacin, AZM= Azithromycin, GEN= Gentamicin, TE= Tetracycline.
